# Supplementary material for: Role of the Phosphatase PTEN in Early Vascular Remodeling
Source: PubMed Central journal article supplement (PMC3606387; doi:10.1371/journal.pone.0055445), 2013-03-22

# Supplemental online figure 1

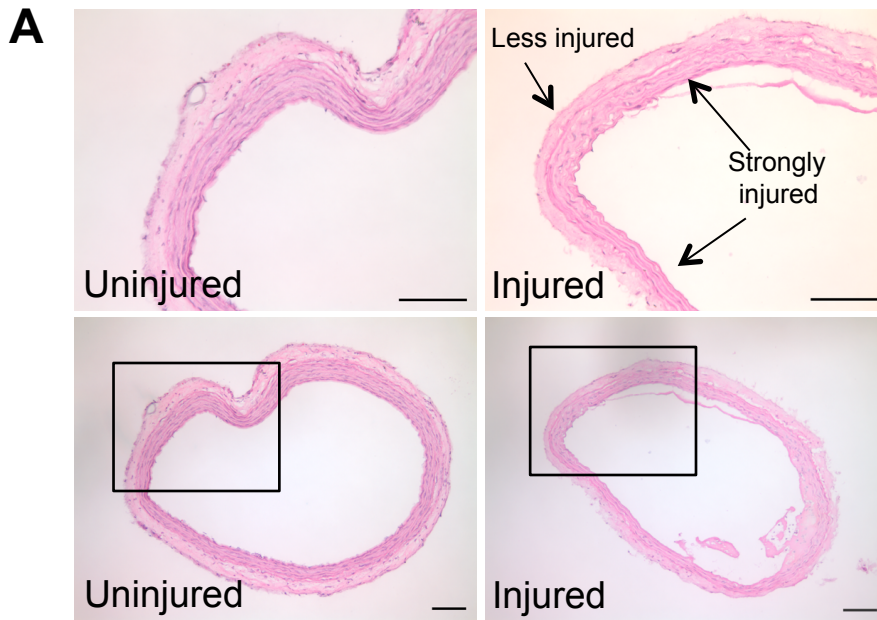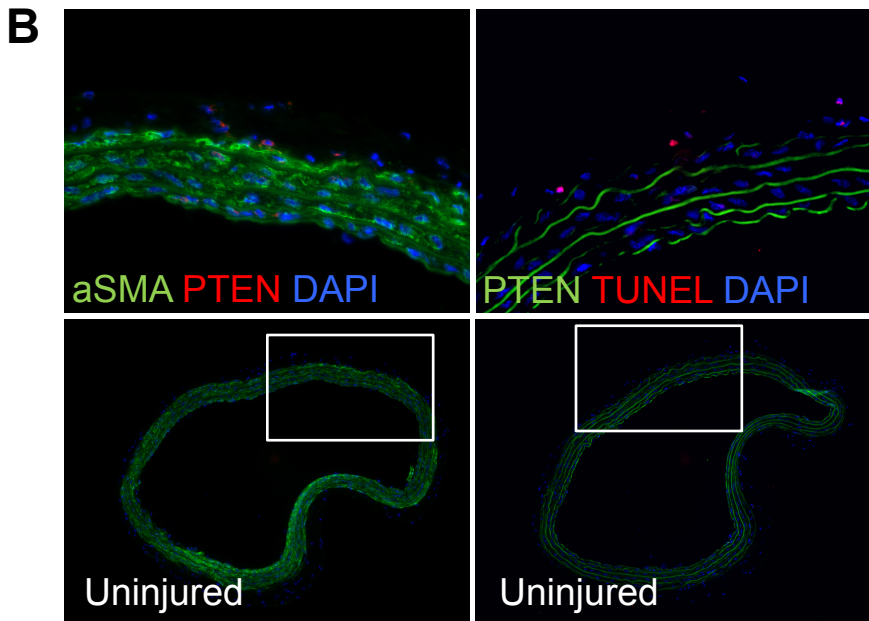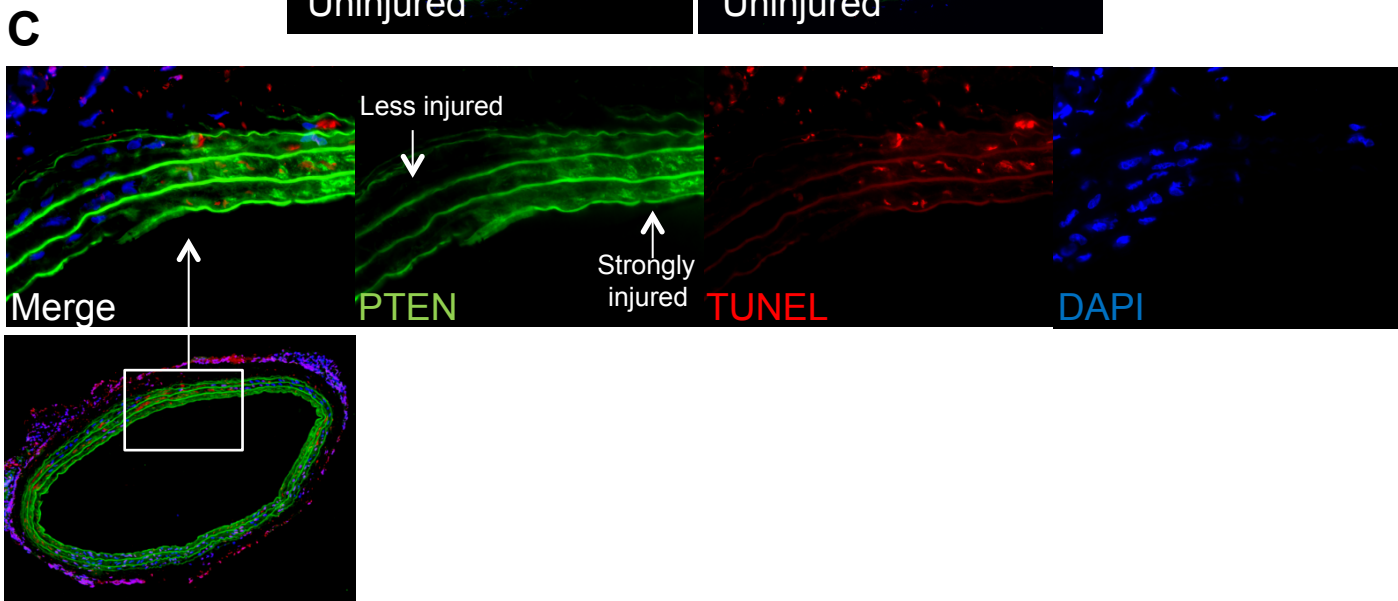

Supplement: pone.0055445.s001.pdf [file pone.0055445.s001.pdf]
